# Supplementary material for: Water Adsorption Dynamics on Metal–Organic Framework MOF-801: Comparative Study of Loose and Glued Grains, and Coatings
Source: MDPI journal article supplement (doi:10.3390/nano13172442), 2023-08-28
Supplement: s1 [file s1]

## Supplementary Materials

### Water adsorption dynamics on metal-organic framework MOF-801:

#### comparative study of loose, glued grains, and coatings

Marina V. Solovyeva\*, Larisa G. Gordeeva

Boreskov Institute of Catalysis, Ak. Lavrentiev av. 5, Novosibirsk, Russia

\*Corresponding author, e-mail address: solovyeva@catalysis.ru

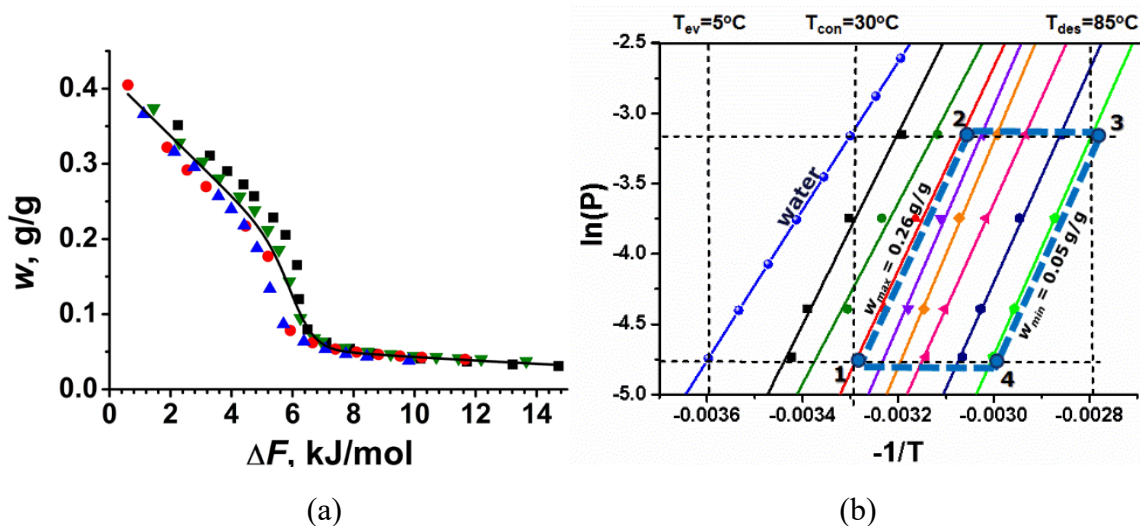

Figure S1. Characteristic curve of water adsorption (a) and isosters (b) of water vapour adsorption on as-prepared MOF-801 powder. Dashed blue lines (b) represent the adsorption cooling cycle. Reprinted from Energy Conv. Manag., vol. 174, Solovyeva M., Gordeeva L., MOF-801 as a promising material for adsorption cooling: Equilibrium and dynamics of water adsorption, pages 356-363, copyright 2018, with permission of Elsevier.

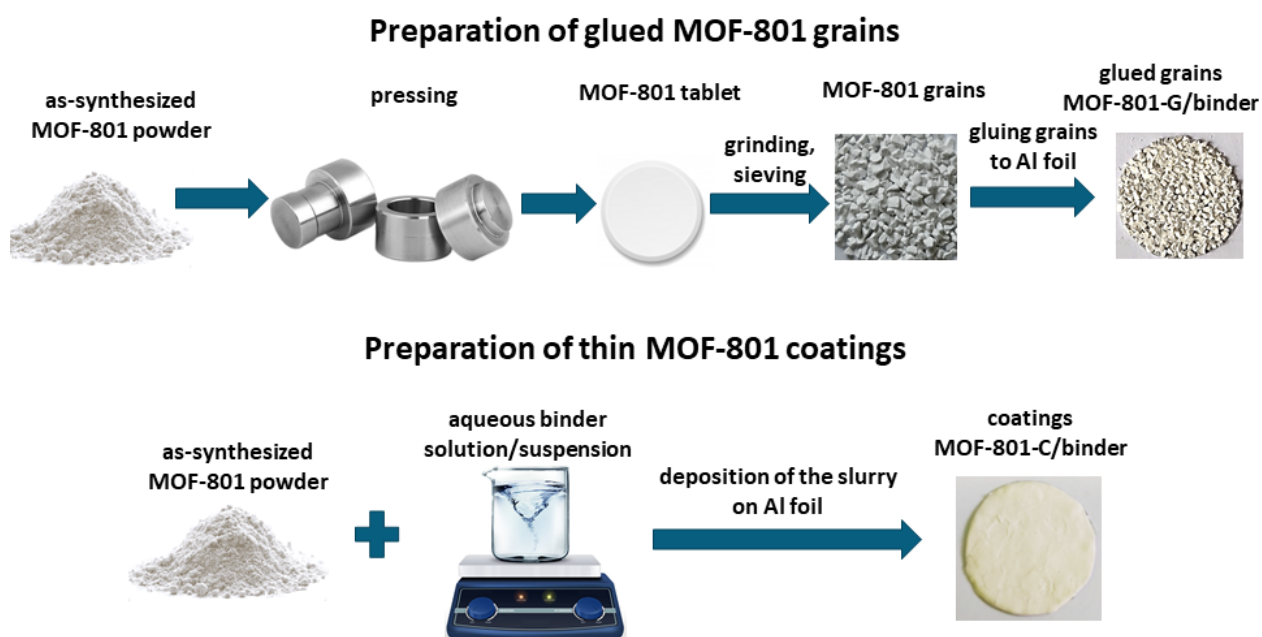

Figure S2. Schematic presentation of the preparation of MOF-801 beds composed of glued grains and coatings.

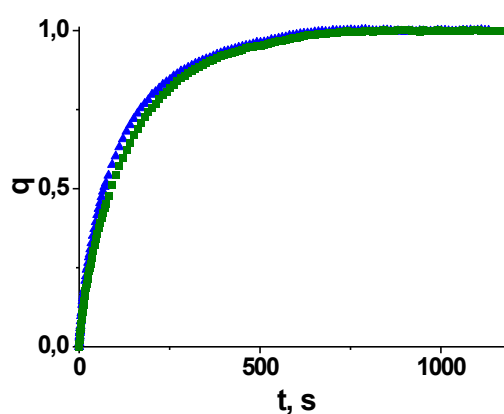

Figure S3. The kinetic curves of water vapour adsorption for the loose grains placed on the surface of aluminum foil (■) and placed on the bottom of the measuring cell (▲).

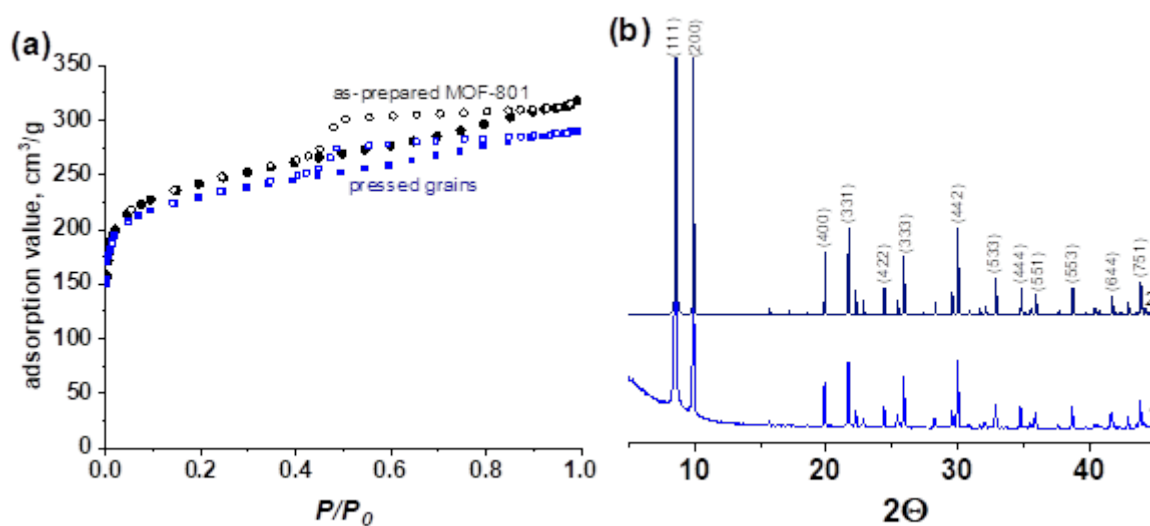

Figure S4. Isotherms of N<sub>2</sub> adsorption on as-prepared MOF-801 and pressed grains (a). Experimental (1) and calculated from single-crystal X-ray data (CIF-file) (2) PXRD patterns of the synthesized MOF-801 (b).

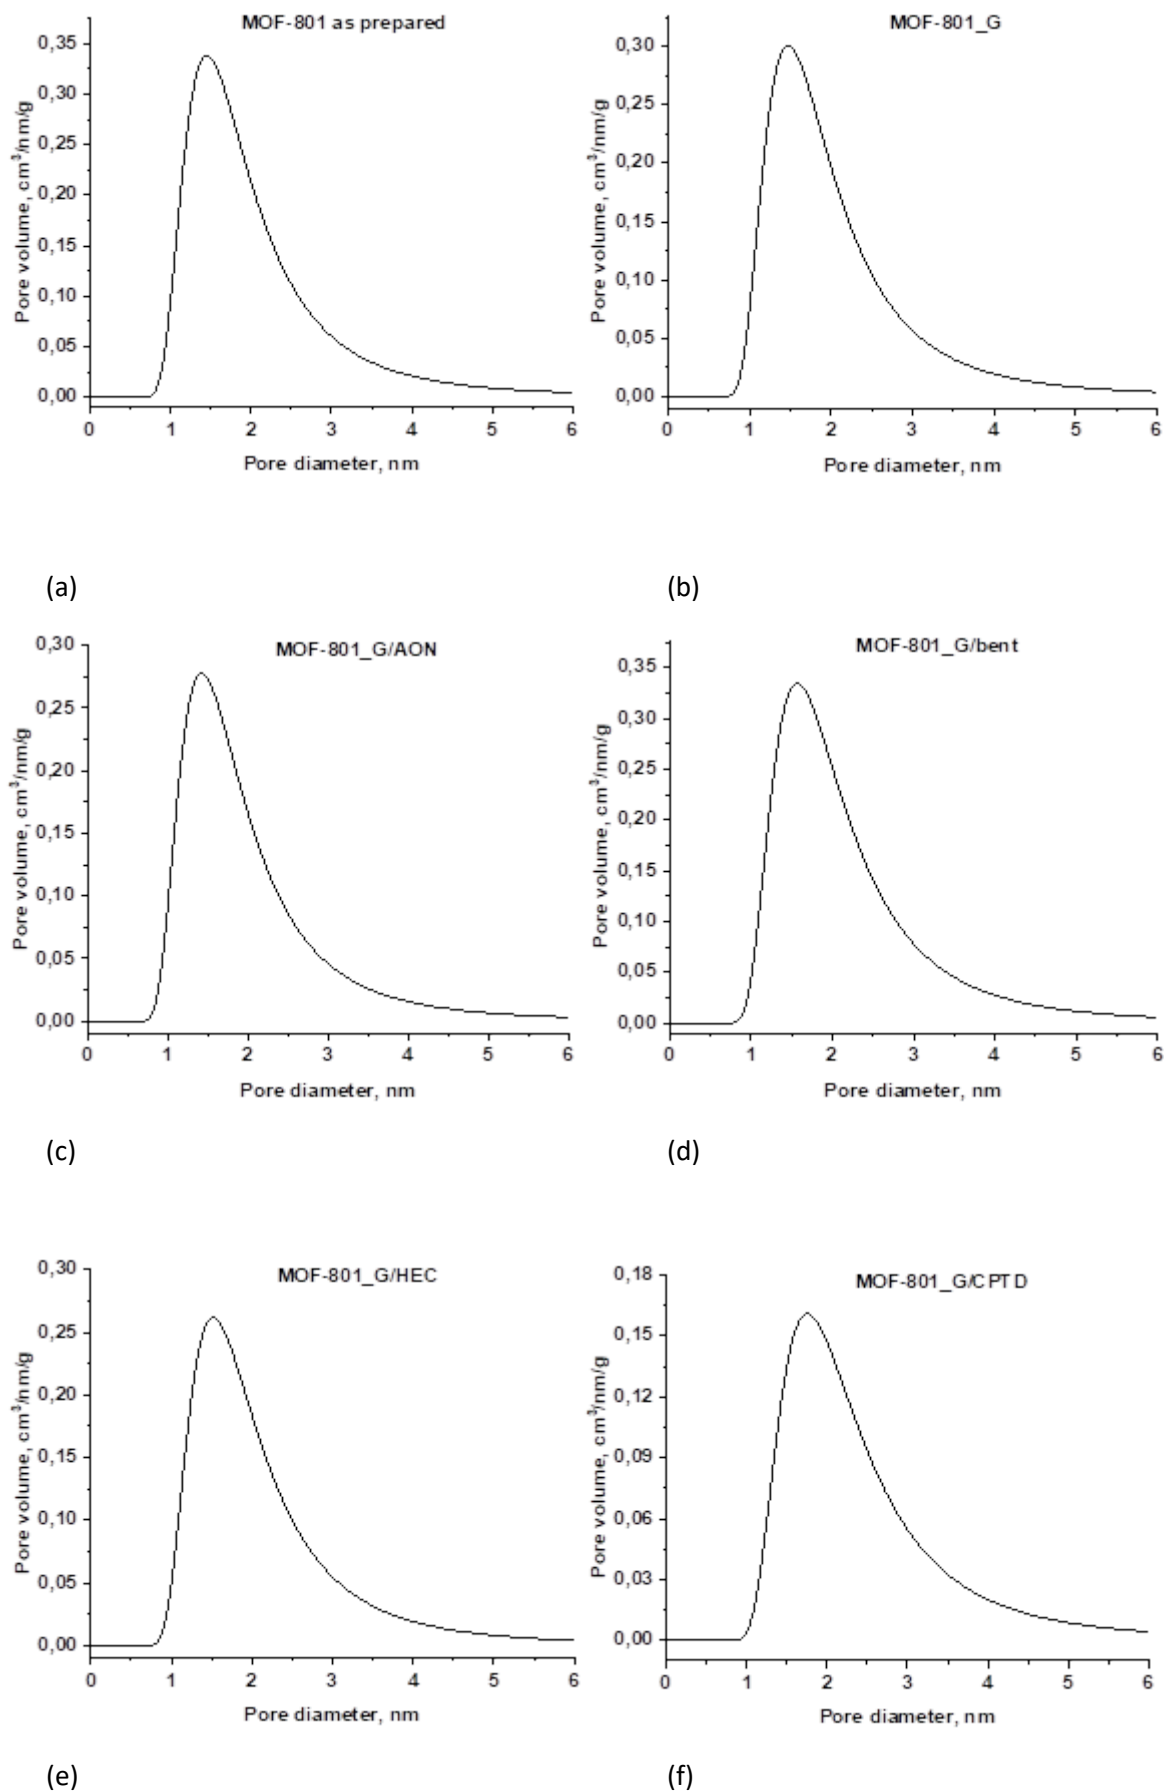

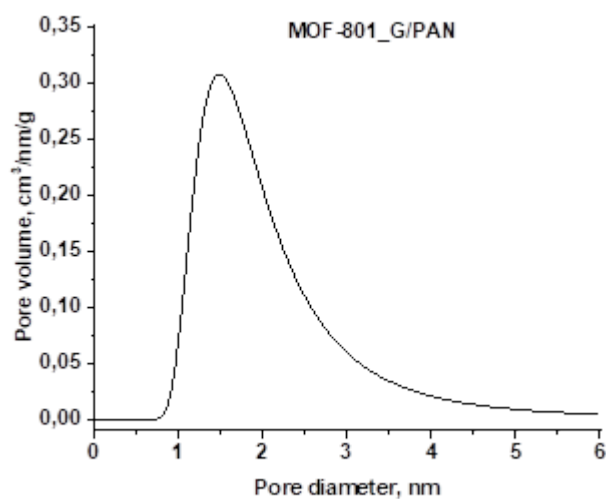

(g)

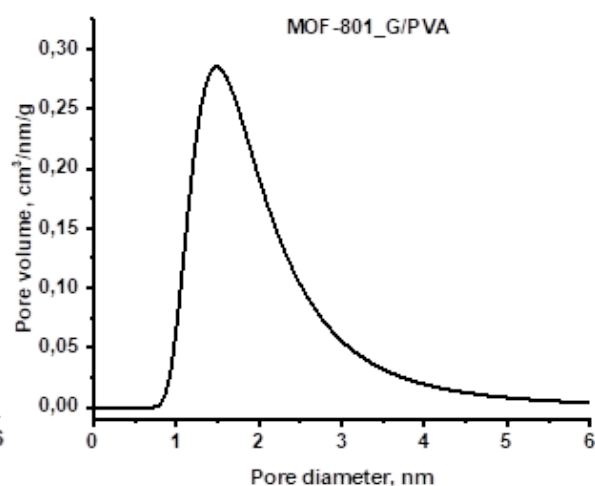

(h)

Figure S5. Pore size distribution of as-prepared MOF-801 powder (a), MOF-801\_G (b), MOF-801\_G/AON\_4.5 (c), MOF-801\_G/bentonite\_4.5 (d), MOF-801\_G/HEC\_4.5 (e), MOF-801\_G/CPTD\_4.5 (f), MOF-801\_G/PAN\_4.5 (g), and MOF-801\_G/PVA\_4.5 (h).

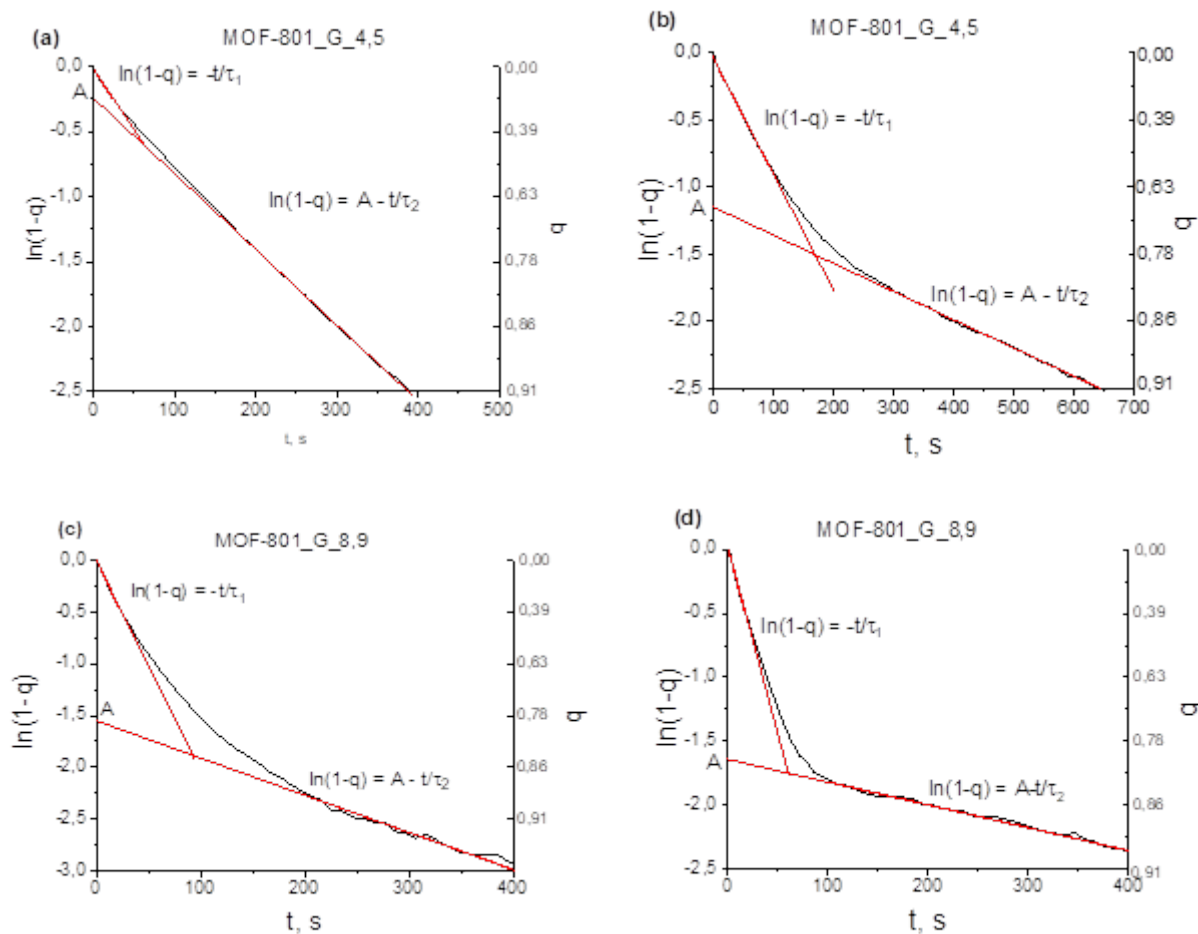

Figure S6. The kinetic curves of water adsorption on (a, c) and desorption from (b, d) reference beds of loose grains MOF-801\_G\_4.5 (a, b) and MOF-801\_G\_8.9 (c, d).

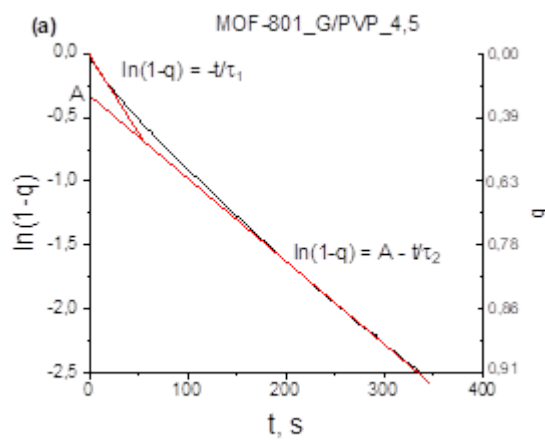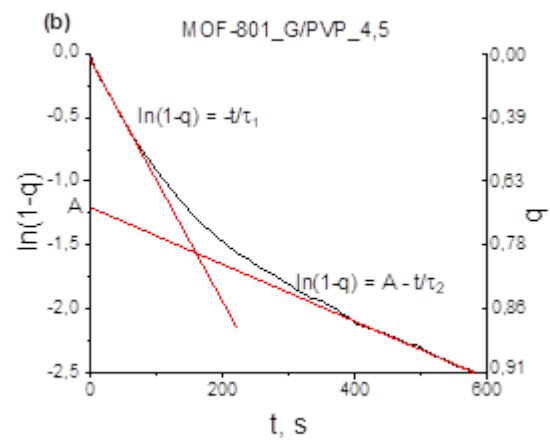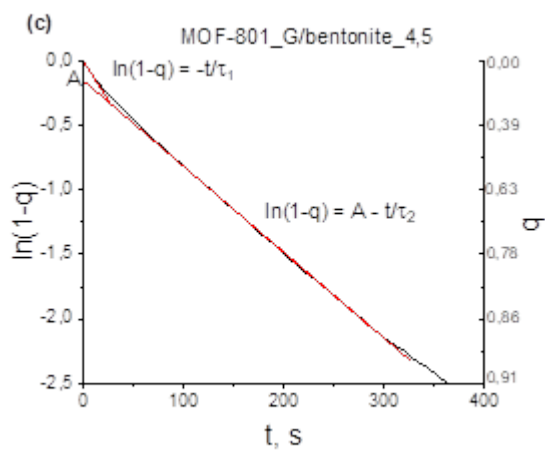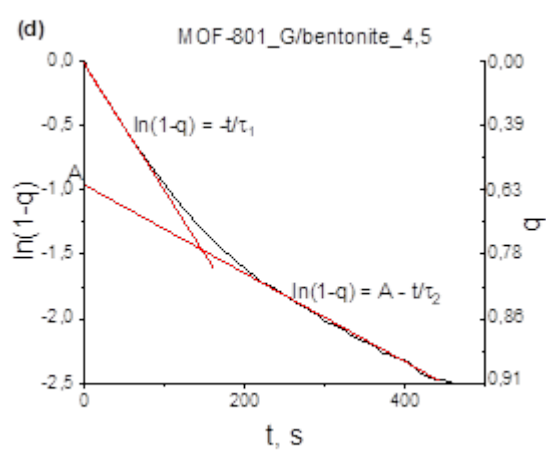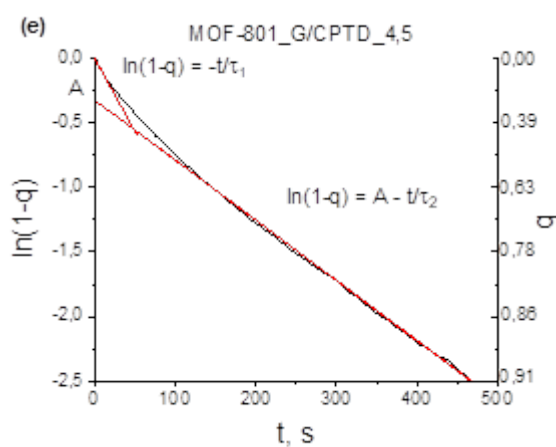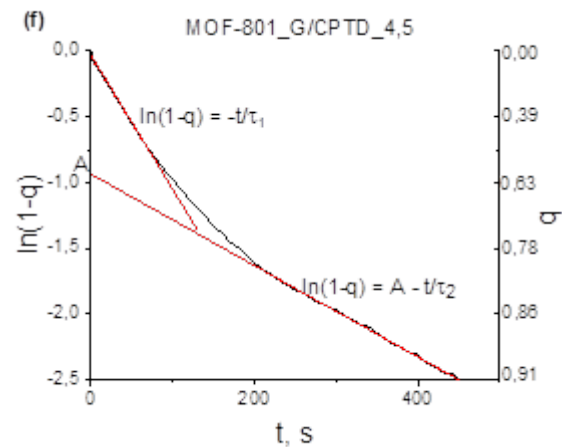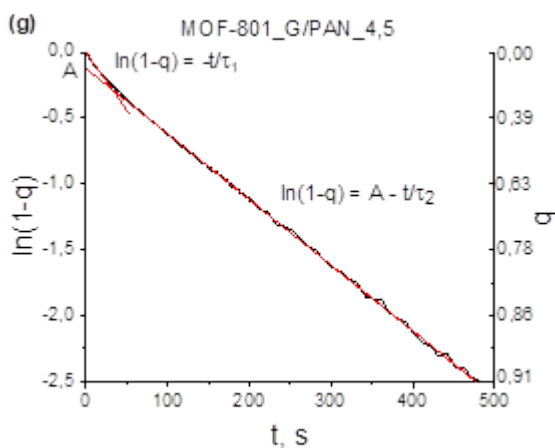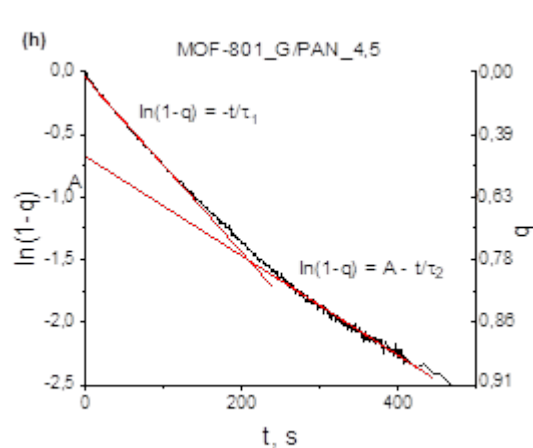

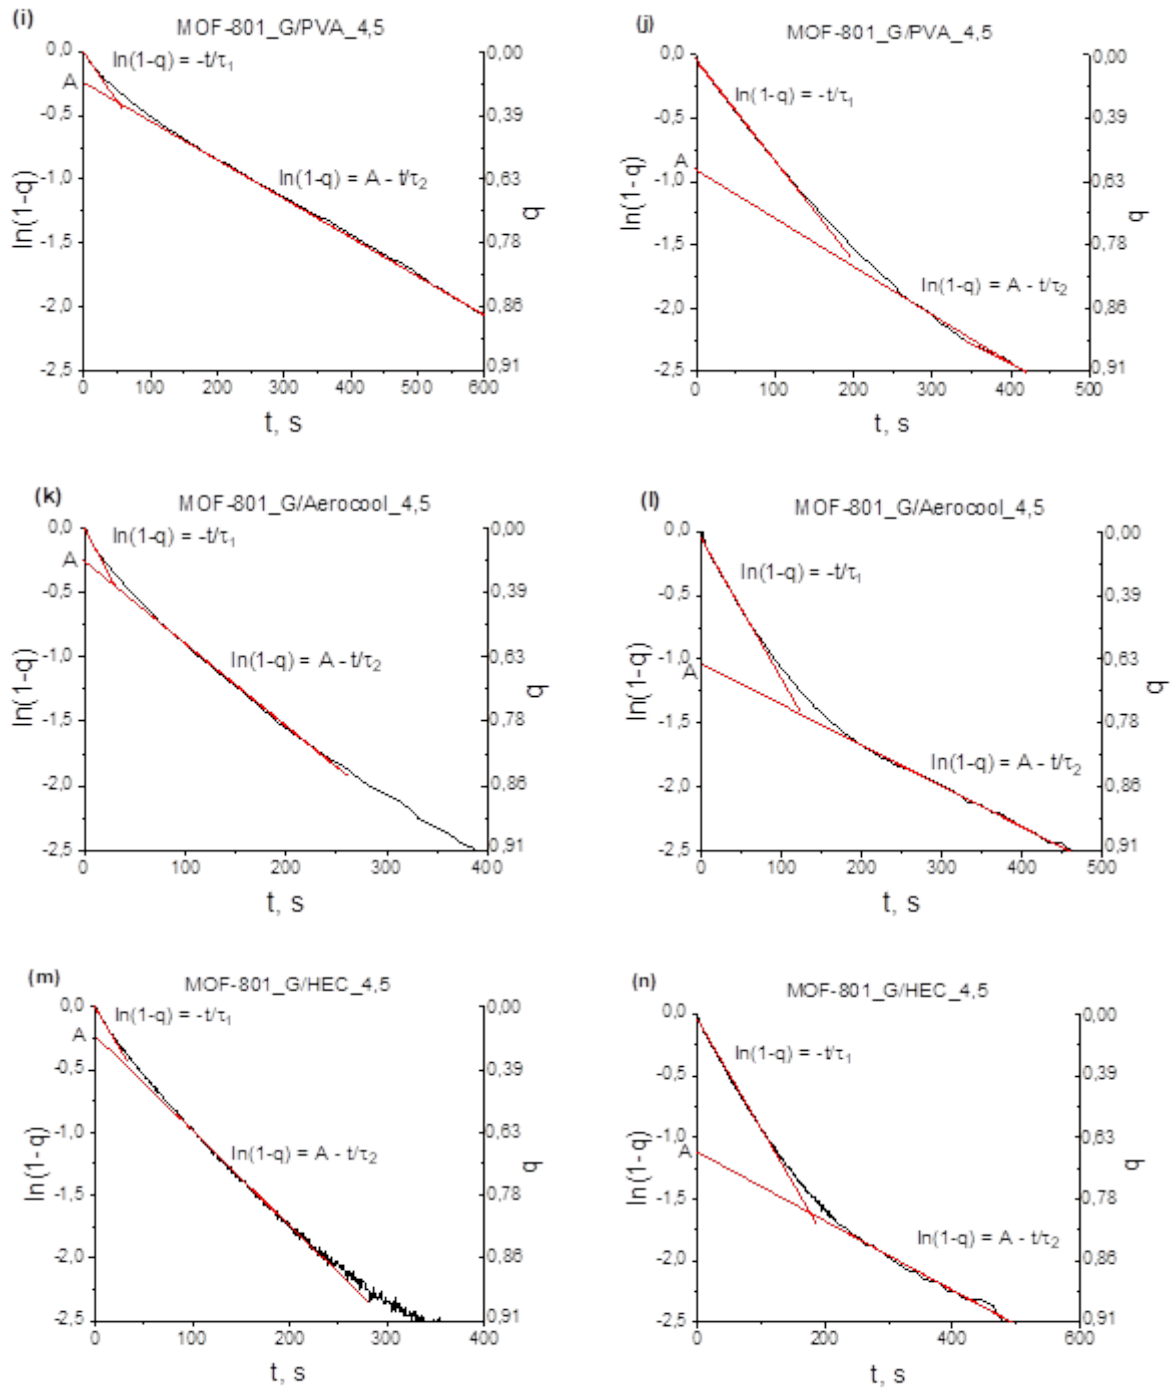

Figure S7. The kinetic curves of water adsorption on (left) and desorption from (right) beds of glued grains MOF-801\_G/PVP\_4.5 (a, b), MOF-801\_G/bentonite\_4.5 (c, d), MOF-801\_G/CPTD\_4.5 (e, f), MOF-801\_G/PAN\_4.5 (g, h), MOF-801\_G/PVA\_4.5 (i, j), MOF-801\_G/Aerocool\_4.5 (k, l), and MOF-801\_G/HEC\_4.5 (m, n).

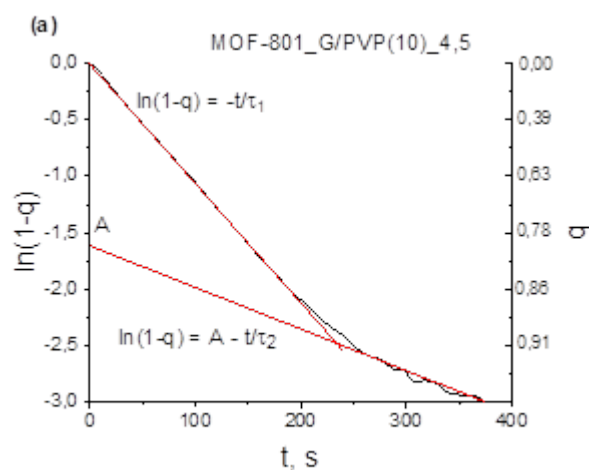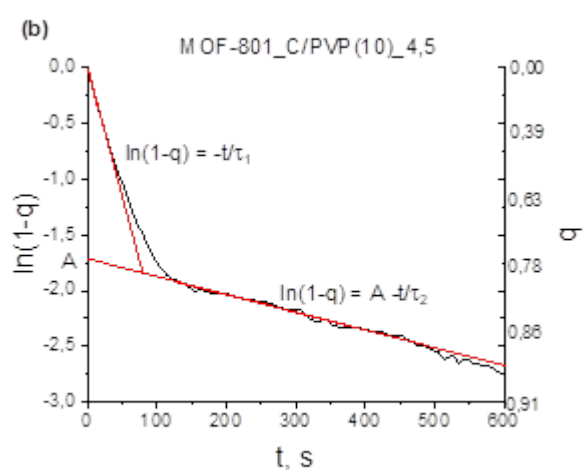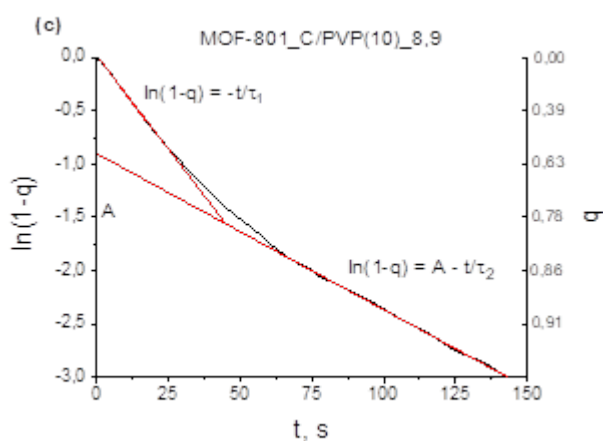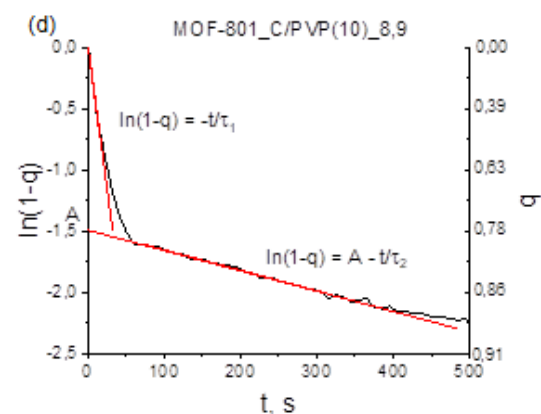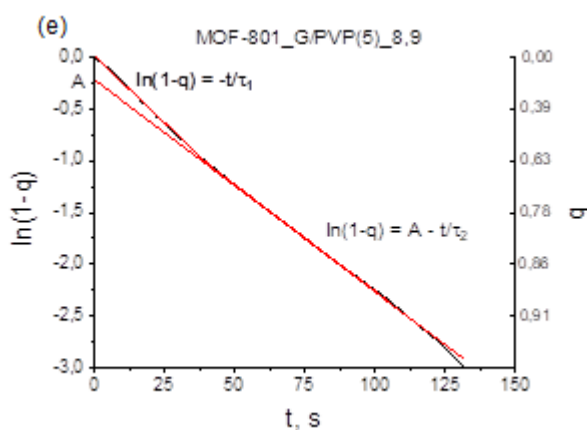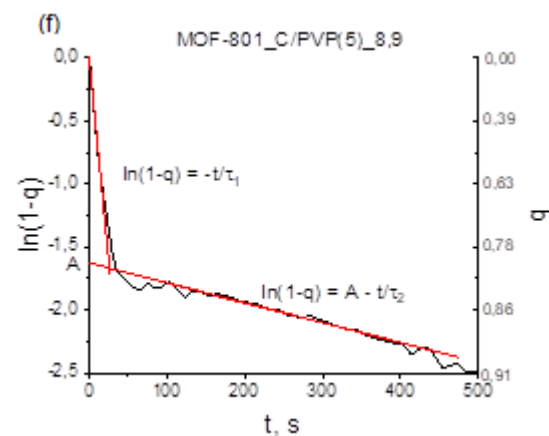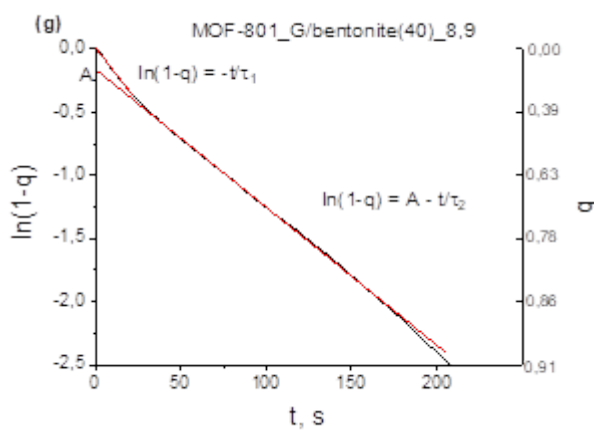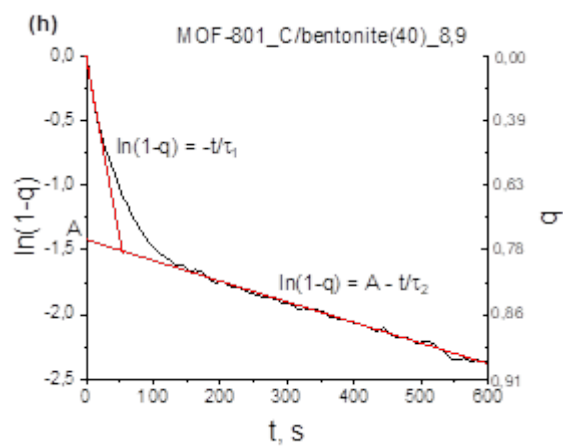

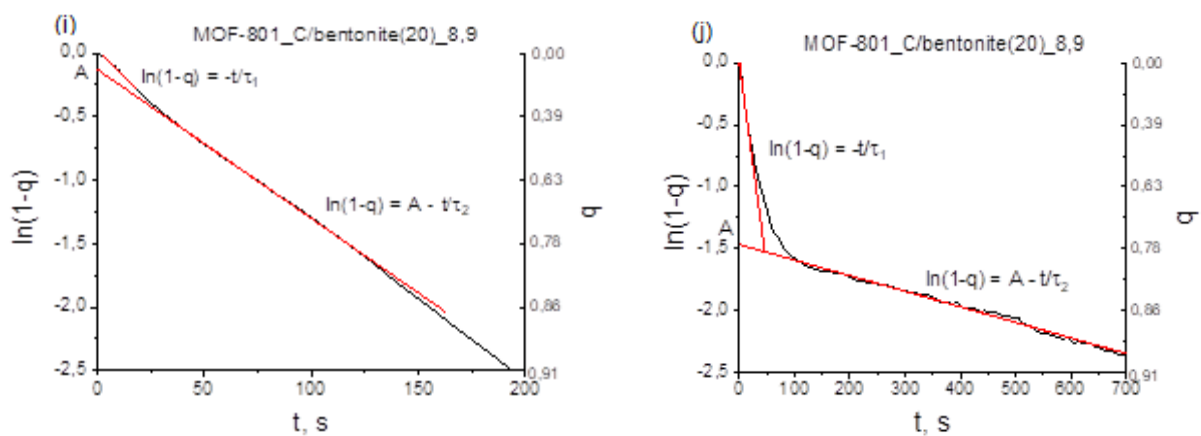

Figure S8. The kinetic curves of water adsorption on (left) and desorption from (right) beds of coatings MOF-801\_C/PVP(10)\_4.5 (a, b), MOF-801\_C/PVP(10)\_8.9 (c, d), MOF-801\_C/PVP(5)\_8.9 (e, f), MOF-801\_C/bentonite(40)\_8.9 (g, h), and MOF-801\_C/bentonite(20)\_8.9 (i, j).
